# Supplementary material for: Detection of biomarkers with graphene nanoplatelets and nanoribbons
Source: Royal Society of Chemistry journal article supplement (doi:10.1039/c3an01585h), 2014-01-01
Supplement: c3an01585h.pdf [file c3an01585h.pdf]

## Supporting Information

### Detection of Biomarkers with Graphene Nanoplatelets and Nanoribbons

Chee Shan Lim, Chun Kiang Chua, and Martin Pumera\*

Table S-1. Peak potentials and detection limits of biomarkers at various surfaces as reported in literature.

| Analyte       | Electrode Surface                           | Peak Potential /V | Detection Limit / $\mu\text{M}$ | Reference                                                                                                                                                |
|---------------|---------------------------------------------|-------------------|---------------------------------|----------------------------------------------------------------------------------------------------------------------------------------------------------|
| Uric Acid     | Gold                                        | +0.45             | -                               | Dey, R. S.; Gupta, S.; Paira, R.; Chen, S-M.; Raj, R. <i>J. Solid State Electrochem.</i> <b>2012</b> , <i>16</i> , 173.                                  |
|               | BPPG modified with 1,4-Naphthoquinone/MWCNT | +0.27             | 0.1                             | Oliveira, A. X.; Silva, S. M.; Leite, F. R. F.; Kubota, L. T.; Damos, F. S.; Cassia Silva Luz, R. <i>Electroanalysis.</i> <b>2013</b> , <i>25</i> , 723. |
| Ascorbic Acid | Functionalised Gold                         | +0.17             | 2.4                             | Zhang, L.; Jia, J.; Zou, X.; Dong, S. <i>Electroanalysis</i> , <b>2004</b> , <i>16</i> , 1413.                                                           |
|               | Gold                                        | +0.51             | -                               | Zhang, L.; Jia, J.; Zou, X.; Dong, S. <i>Electroanalysis</i> , <b>2004</b> , <i>16</i> , 1413.                                                           |
|               | BPPG                                        | +1.06             | -                               | Hadi, M.; Rouhollahi, A.; Yousefi, M. <i>Electroanalysis</i> , <b>2011</b> , <i>23</i> , 1497.                                                           |
|               | EPPG                                        | +0.24             | -                               | Hadi, M.;                                                                                                                                                |

|          |                                      |                 |      |                                                                                                                                                                 |
|----------|--------------------------------------|-----------------|------|-----------------------------------------------------------------------------------------------------------------------------------------------------------------|
| Dopamine |                                      |                 |      | Rouhollahi, A.; Yousefi, M. <i>Electroanalysis</i> , <b>2011</b> , <i>23</i> , 1497.                                                                            |
|          | Pyrolytic carbon film electrodes     | +0.18           | 0.12 | Hadi, M.; Rouhollahi, A.; Yousefi, M. <i>Electroanalysis</i> , <b>2011</b> , <i>23</i> , 1497.                                                                  |
|          | Functionalised Gold                  | +0.24           | 1.2  | Zhang, L.; Jia, J.; Zou, X.; Dong, S. <i>Electroanalysis</i> , <b>2004</b> , <i>16</i> , 1413.                                                                  |
|          | Gold                                 | +0.46           | -    | Zhang, L.; Jia, J.; Zou, X.; Dong, S. <i>Electroanalysis</i> , <b>2004</b> , <i>16</i> , 1413.                                                                  |
| NADH     | Pyrolytic carbon film electrodes     | +0.02 to +0.27  | 2.3  | Keeley, G. P.; McEvoy, N.; Nolan, H.; Kumar, S.; Rezvani, E.; Holzinger, M.; Cosnier, S.; Duesberg, G. S. <i>Anal. Methods</i> . <b>2012</b> , <i>4</i> , 2048. |
|          | BPPG                                 | +0.59           | -    | Saleh, F. S.; Rahman, M. R.; Okajima, T.; Mao, L.; Ohsaka, T. <i>Bioelectrochemistry</i> , <b>2011</b> , <i>80</i> , 121.                                       |
|          | Mesoporous Carbon Modified Electrode | +0.3 (vs. SCE)  | 1.0  | Wang, Y.; You, C.; Zhang, S.; Kong, J.; Marty, J-L.; Zhao, D.; Liu, B. <i>Microchimica Acta</i> . <b>2012</b> , <i>167</i> , 75.                                |
| Guanine  | CNT                                  | +0.38           | -    | Wooten, M.; Gorski, W. <i>Anal. Chem.</i> <b>2010</b> , <i>82</i> , 1299.                                                                                       |
|          | BPPG                                 | +0.71 (vs. SCE) | -    | Li, Q.; Batchelor-McAuley, C.; Compton, R. G. <i>J. Phys. Chem. B</i> . <b>2010</b> , <i>114</i> , 7423.                                                        |

|         |                                                                |                 |      |                                                                                                         |
|---------|----------------------------------------------------------------|-----------------|------|---------------------------------------------------------------------------------------------------------|
|         | HOPG                                                           | +0.73 (vs. SCE) | -    | Li, Q.; Batchelor-McAuley, C.; Compton, R. G. <i>J. Phys. Chem. B.</i> <b>2010</b> , <i>114</i> , 7423. |
|         | GCE/MWCNT-poly(new fuchsin) modified electrode                 | +0.65           | 18.2 | Tang, C.; Yogeswaran, U.; Chen, S-M. <i>Anal. Chim. Acta.</i> <b>2009</b> , <i>636</i> , 19.            |
|         | Graphitized mesoporous carbon modified glassy carbon electrode | +0.65           | 0.76 | Thangaraj, R.; Kumar, A. S. <i>J. Solid. State. Electrochem.</i> <b>2013</b> , <i>17</i> , 583.         |
| Adenine | BPPG                                                           | +1.03 (vs. SCE) | -    | Randviir, E. P.; Banks, C. E. <i>RSC Adv.</i> <b>2012</b> , <i>2</i> , 5800.                            |
|         | EPPG                                                           | +0.96 (vs. SCE) | -    | Randviir, E. P.; Banks, C. E. <i>RSC Adv.</i> <b>2012</b> , <i>2</i> , 5800.                            |
|         | GCE/MWCNT-poly(new fuchsin) modified electrode                 | +1.04           | 8.60 | Tang, C.; Yogeswaran, U.; Chen, S-M. <i>Anal. Chim. Acta.</i> <b>2009</b> , <i>636</i> , 19.            |
|         | Graphitized mesoporous carbon modified glassy carbon electrode | +0.85           | 0.63 | Thangaraj, R.; Kumar, A. S. <i>J. Solid. State. Electrochem.</i> <b>2013</b> , <i>17</i> , 583.         |
